# Supplementary material for: LOST to follow-up Information in Trials (LOST-IT): a protocol on the potential impact
Source: PubMed Central journal article supplement (PMC2706244; doi:10.1186/1745-6215-10-40), 2009-06-11
Supplement: 1745-6215-10-40-S2.pdf [file 1745-6215-10-40-S2.pdf]

# LOST Information in Trials (LOST-IT) study

## Title and Abstract screening Form (version 9)

Screener initials:        Study ID:          Author, year: \_\_\_\_\_, **2005**  
 Journal:       AIM       BMJ       JAMA       Lancet       NEJM

1. Eligible RCT?       No      **→ Exclude, stop here**  
                                   Yes or unclear      **→ Get Full Text, answer questions below**
  
2. Trial described as:       Non-inferiority  
                                   Equivalence  
                                   Neither
  
3. Primary outcome clearly specified       Yes, one: \_\_\_\_\_ (go to q5)  
                                   No, multiple primary outcomes: \_\_\_\_\_  
                                  \_\_\_\_\_ (go to q4)  
                                   None specified (go to q4)
  
4. If multiple or no primary outcome specified, select one : \_\_\_\_\_
  
5. Primary outcome category # (refer to the box): \_\_\_\_\_ (e.g. II.3)
  
6. The primary outcome is a:       Time to event outcome  
                                   Continuous outcome (not time to event)  
                                   Multinomial outcome  
                                   Binary outcome reported as rate  
                                   Binary outcome
  
7. Is it a composite endpoint?       Yes  
                                   No
  
8. Is it a patient important outcome?       Yes  
                                   No  
                                   Not clear
  
9. Is the result statistically significant?       Yes  
                                   No  
                                   Not clear

- I. Mortality
  - 1. all cause mortality
  - 2. disease specific mortality
- II. Morbidity
  - 1. cardiovascular major morbid events
  - 2. other major morbid events
  - 3. recurrence/relapse/remission of cancer and other chronic diseases
  - 4. renal failure requiring dialysis
  - 5. hospitalizations, medical and surgical procedures
  - 6. infections
  - 7. dermatological/ rheumatologic disorders
- III. Symptoms/Quality of life/Functional status
- IV. Surrogate outcomes

Please fill out this box for each study

**Exclude**  
 **Get full text**  
 **3<sup>rd</sup> reviewer needed** (no consensus between 2 reviewers)

**If exclude, reason for exclusion:**

Not RCT  
 Not eligible RCT  
 Other:
