# Supplementary material for: LOST to follow-up Information in Trials (LOST-IT): a protocol on the potential impact
Source: PubMed Central journal article supplement (PMC2706244; doi:10.1186/1745-6215-10-40), 2009-06-11
Supplement: 1745-6215-10-40-S3.pdf [file 1745-6215-10-40-S3.pdf]

# LOST Information in Trials (LOST-IT) study

## Data abstraction Form

|                                                                                                                                                                |                 |                            |
|----------------------------------------------------------------------------------------------------------------------------------------------------------------|-----------------|----------------------------|
| Screener initials: _____                                                                                                                                       | Study ID: _____ | Author, year: _____, _____ |
| Journal: <input type="checkbox"/> AIM <input type="checkbox"/> BMJ <input type="checkbox"/> JAMA <input type="checkbox"/> Lancet <input type="checkbox"/> NEJM |                 |                            |

1. Eligible RCT?  No  **Exclude, stop here**  
 Yes, type of RCT:  
 Two arms  Multiple Arms  
 Factorial design  Report of longer follow up time  
 Report of secondary analysis  Report of subgroup analysis
2. Trial described as:  Non-inferiority  
 Equivalence  
 Neither
3. Primary outcome clearly specified  Yes, one: \_\_\_\_\_ (go to q5)  
 No, multiple primary outcomes: \_\_\_\_\_  
\_\_\_\_\_ (go to q4)  
 None specified (go to q4)
4. If multiple or no primary outcome specified, select one : \_\_\_\_\_
5. Primary outcome category # (refer to the guide): \_\_\_\_\_ (e.g. II.3)
6. Effect on primary endpoint reported as:  Continuous outcome exclusively  **Exclude**  
 Multinomial outcome exclusively  **Exclude**  
 Binary outcome expressed as rate exclusively  **Exclude**  
 Binary outcome, data not available for 2x2 table  **Exclude**  
 Binary outcome, data available for 2x2 table, go to the next question
7. Is it a composite endpoint?  Yes, list components: \_\_\_\_\_  
 No
8. Is it a patient important outcome?  No  **Exclude**  
 Yes, go to the next question
9. Result statistically significant?  No  **Exclude**  
 Yes

Please fill out this box for each study

|                                                                                                   |
|---------------------------------------------------------------------------------------------------|
| <input type="checkbox"/> <b>Include in LOST-IT</b>                                                |
| <input type="checkbox"/> <b>Exclude from LOST-IT</b>                                              |
| <input type="checkbox"/> <b>3<sup>rd</sup> reviewer needed</b> (no consensus between 2 reviewers) |

|                                                                                    |
|------------------------------------------------------------------------------------|
| <b>If exclude, reason for exclusion:</b>                                           |
| <input type="checkbox"/> Not RCT                                                   |
| <input type="checkbox"/> Not eligible RCT                                          |
| <input type="checkbox"/> Data for the primary endpoint not available for 2x2 table |
| <input type="checkbox"/> Outcome not patient important                             |
| <input type="checkbox"/> Result not statistically significant                      |

| BACKGROUND INFORMATION                               |                                                                        |                                                                                                                                                                                                                                                                                                                                                                                                                                                                                                                                                                                                                                                                                                                                                                                                                                                                                                                                                                                                                                                                                                                                                                                                                                                                                                                                                                                                                                                                                                                                                                                                                                     |                                          |                                                                    |                                                      |                                                                    |                                          |                                                    |                                                      |                                                    |                                            |                                        |                                     |                                             |                                         |                                                                        |                                              |                                       |                                    |                                          |                                   |                                           |                                      |                                           |                                |                                           |                                      |                                                    |                                       |  |                                                    |  |
|------------------------------------------------------|------------------------------------------------------------------------|-------------------------------------------------------------------------------------------------------------------------------------------------------------------------------------------------------------------------------------------------------------------------------------------------------------------------------------------------------------------------------------------------------------------------------------------------------------------------------------------------------------------------------------------------------------------------------------------------------------------------------------------------------------------------------------------------------------------------------------------------------------------------------------------------------------------------------------------------------------------------------------------------------------------------------------------------------------------------------------------------------------------------------------------------------------------------------------------------------------------------------------------------------------------------------------------------------------------------------------------------------------------------------------------------------------------------------------------------------------------------------------------------------------------------------------------------------------------------------------------------------------------------------------------------------------------------------------------------------------------------------------|------------------------------------------|--------------------------------------------------------------------|------------------------------------------------------|--------------------------------------------------------------------|------------------------------------------|----------------------------------------------------|------------------------------------------------------|----------------------------------------------------|--------------------------------------------|----------------------------------------|-------------------------------------|---------------------------------------------|-----------------------------------------|------------------------------------------------------------------------|----------------------------------------------|---------------------------------------|------------------------------------|------------------------------------------|-----------------------------------|-------------------------------------------|--------------------------------------|-------------------------------------------|--------------------------------|-------------------------------------------|--------------------------------------|----------------------------------------------------|---------------------------------------|--|----------------------------------------------------|--|
| 10.                                                  | Number of study centers                                                | n =                                                                                                                                                                                                                                                                                                                                                                                                                                                                                                                                                                                                                                                                                                                                                                                                                                                                                                                                                                                                                                                                                                                                                                                                                                                                                                                                                                                                                                                                                                                                                                                                                                 |                                          |                                                                    |                                                      |                                                                    |                                          |                                                    |                                                      |                                                    |                                            |                                        |                                     |                                             |                                         |                                                                        |                                              |                                       |                                    |                                          |                                   |                                           |                                      |                                           |                                |                                           |                                      |                                                    |                                       |  |                                                    |  |
| 11.                                                  | <b>Funding</b><br><i>Check all that Apply</i>                          | <input type="checkbox"/> Private for profit, industry only supplying medication<br><input type="checkbox"/> Private for profit, other<br><input type="checkbox"/> Private not for profit<br><input type="checkbox"/> Governmental<br><input type="checkbox"/> Not funded<br><input type="checkbox"/> Not reported                                                                                                                                                                                                                                                                                                                                                                                                                                                                                                                                                                                                                                                                                                                                                                                                                                                                                                                                                                                                                                                                                                                                                                                                                                                                                                                   |                                          |                                                                    |                                                      |                                                                    |                                          |                                                    |                                                      |                                                    |                                            |                                        |                                     |                                             |                                         |                                                                        |                                              |                                       |                                    |                                          |                                   |                                           |                                      |                                           |                                |                                           |                                      |                                                    |                                       |  |                                                    |  |
| 12.                                                  | <b>Clinical area</b><br><i>Check only one</i>                          | <table border="0"> <tr> <td><b>Medical</b></td> <td><b>Surgical</b></td> </tr> <tr> <td><input type="checkbox"/> Dermatology</td> <td><input type="checkbox"/> Cardiac surgery</td> </tr> <tr> <td><input type="checkbox"/> Cardiology</td> <td><input type="checkbox"/> General surgery</td> </tr> <tr> <td><input type="checkbox"/> Endocrinology</td> <td><input type="checkbox"/> Obstetrics/ Gynecology</td> </tr> <tr> <td><input type="checkbox"/> Gastro Intestinal</td> <td><input type="checkbox"/> Ophthalmology</td> </tr> <tr> <td><input type="checkbox"/> Hematology</td> <td><input type="checkbox"/> Orthopedic surgery</td> </tr> <tr> <td><input type="checkbox"/> Intensive Care</td> <td><input type="checkbox"/> Otorhinolaryngology (ENT:<br/>Ear Nose Throat)</td> </tr> <tr> <td><input type="checkbox"/> Infectious Diseases</td> <td><input type="checkbox"/> Neurosurgery</td> </tr> <tr> <td><input type="checkbox"/> Neurology</td> <td><input type="checkbox"/> Plastic surgery</td> </tr> <tr> <td><input type="checkbox"/> Oncology</td> <td><input type="checkbox"/> Thoracic surgery</td> </tr> <tr> <td><input type="checkbox"/> Psychiatric</td> <td><input type="checkbox"/> Urologic surgery</td> </tr> <tr> <td><input type="checkbox"/> Renal</td> <td><input type="checkbox"/> Vascular surgery</td> </tr> <tr> <td><input type="checkbox"/> Respiratory</td> <td><input type="checkbox"/> Other (<i>specify</i>):</td> </tr> <tr> <td><input type="checkbox"/> Rheumatology</td> <td></td> </tr> <tr> <td><input type="checkbox"/> Other (<i>specify</i>):</td> <td></td> </tr> </table> | <b>Medical</b>                           | <b>Surgical</b>                                                    | <input type="checkbox"/> Dermatology                 | <input type="checkbox"/> Cardiac surgery                           | <input type="checkbox"/> Cardiology      | <input type="checkbox"/> General surgery           | <input type="checkbox"/> Endocrinology               | <input type="checkbox"/> Obstetrics/ Gynecology    | <input type="checkbox"/> Gastro Intestinal | <input type="checkbox"/> Ophthalmology | <input type="checkbox"/> Hematology | <input type="checkbox"/> Orthopedic surgery | <input type="checkbox"/> Intensive Care | <input type="checkbox"/> Otorhinolaryngology (ENT:<br>Ear Nose Throat) | <input type="checkbox"/> Infectious Diseases | <input type="checkbox"/> Neurosurgery | <input type="checkbox"/> Neurology | <input type="checkbox"/> Plastic surgery | <input type="checkbox"/> Oncology | <input type="checkbox"/> Thoracic surgery | <input type="checkbox"/> Psychiatric | <input type="checkbox"/> Urologic surgery | <input type="checkbox"/> Renal | <input type="checkbox"/> Vascular surgery | <input type="checkbox"/> Respiratory | <input type="checkbox"/> Other ( <i>specify</i> ): | <input type="checkbox"/> Rheumatology |  | <input type="checkbox"/> Other ( <i>specify</i> ): |  |
| <b>Medical</b>                                       | <b>Surgical</b>                                                        |                                                                                                                                                                                                                                                                                                                                                                                                                                                                                                                                                                                                                                                                                                                                                                                                                                                                                                                                                                                                                                                                                                                                                                                                                                                                                                                                                                                                                                                                                                                                                                                                                                     |                                          |                                                                    |                                                      |                                                                    |                                          |                                                    |                                                      |                                                    |                                            |                                        |                                     |                                             |                                         |                                                                        |                                              |                                       |                                    |                                          |                                   |                                           |                                      |                                           |                                |                                           |                                      |                                                    |                                       |  |                                                    |  |
| <input type="checkbox"/> Dermatology                 | <input type="checkbox"/> Cardiac surgery                               |                                                                                                                                                                                                                                                                                                                                                                                                                                                                                                                                                                                                                                                                                                                                                                                                                                                                                                                                                                                                                                                                                                                                                                                                                                                                                                                                                                                                                                                                                                                                                                                                                                     |                                          |                                                                    |                                                      |                                                                    |                                          |                                                    |                                                      |                                                    |                                            |                                        |                                     |                                             |                                         |                                                                        |                                              |                                       |                                    |                                          |                                   |                                           |                                      |                                           |                                |                                           |                                      |                                                    |                                       |  |                                                    |  |
| <input type="checkbox"/> Cardiology                  | <input type="checkbox"/> General surgery                               |                                                                                                                                                                                                                                                                                                                                                                                                                                                                                                                                                                                                                                                                                                                                                                                                                                                                                                                                                                                                                                                                                                                                                                                                                                                                                                                                                                                                                                                                                                                                                                                                                                     |                                          |                                                                    |                                                      |                                                                    |                                          |                                                    |                                                      |                                                    |                                            |                                        |                                     |                                             |                                         |                                                                        |                                              |                                       |                                    |                                          |                                   |                                           |                                      |                                           |                                |                                           |                                      |                                                    |                                       |  |                                                    |  |
| <input type="checkbox"/> Endocrinology               | <input type="checkbox"/> Obstetrics/ Gynecology                        |                                                                                                                                                                                                                                                                                                                                                                                                                                                                                                                                                                                                                                                                                                                                                                                                                                                                                                                                                                                                                                                                                                                                                                                                                                                                                                                                                                                                                                                                                                                                                                                                                                     |                                          |                                                                    |                                                      |                                                                    |                                          |                                                    |                                                      |                                                    |                                            |                                        |                                     |                                             |                                         |                                                                        |                                              |                                       |                                    |                                          |                                   |                                           |                                      |                                           |                                |                                           |                                      |                                                    |                                       |  |                                                    |  |
| <input type="checkbox"/> Gastro Intestinal           | <input type="checkbox"/> Ophthalmology                                 |                                                                                                                                                                                                                                                                                                                                                                                                                                                                                                                                                                                                                                                                                                                                                                                                                                                                                                                                                                                                                                                                                                                                                                                                                                                                                                                                                                                                                                                                                                                                                                                                                                     |                                          |                                                                    |                                                      |                                                                    |                                          |                                                    |                                                      |                                                    |                                            |                                        |                                     |                                             |                                         |                                                                        |                                              |                                       |                                    |                                          |                                   |                                           |                                      |                                           |                                |                                           |                                      |                                                    |                                       |  |                                                    |  |
| <input type="checkbox"/> Hematology                  | <input type="checkbox"/> Orthopedic surgery                            |                                                                                                                                                                                                                                                                                                                                                                                                                                                                                                                                                                                                                                                                                                                                                                                                                                                                                                                                                                                                                                                                                                                                                                                                                                                                                                                                                                                                                                                                                                                                                                                                                                     |                                          |                                                                    |                                                      |                                                                    |                                          |                                                    |                                                      |                                                    |                                            |                                        |                                     |                                             |                                         |                                                                        |                                              |                                       |                                    |                                          |                                   |                                           |                                      |                                           |                                |                                           |                                      |                                                    |                                       |  |                                                    |  |
| <input type="checkbox"/> Intensive Care              | <input type="checkbox"/> Otorhinolaryngology (ENT:<br>Ear Nose Throat) |                                                                                                                                                                                                                                                                                                                                                                                                                                                                                                                                                                                                                                                                                                                                                                                                                                                                                                                                                                                                                                                                                                                                                                                                                                                                                                                                                                                                                                                                                                                                                                                                                                     |                                          |                                                                    |                                                      |                                                                    |                                          |                                                    |                                                      |                                                    |                                            |                                        |                                     |                                             |                                         |                                                                        |                                              |                                       |                                    |                                          |                                   |                                           |                                      |                                           |                                |                                           |                                      |                                                    |                                       |  |                                                    |  |
| <input type="checkbox"/> Infectious Diseases         | <input type="checkbox"/> Neurosurgery                                  |                                                                                                                                                                                                                                                                                                                                                                                                                                                                                                                                                                                                                                                                                                                                                                                                                                                                                                                                                                                                                                                                                                                                                                                                                                                                                                                                                                                                                                                                                                                                                                                                                                     |                                          |                                                                    |                                                      |                                                                    |                                          |                                                    |                                                      |                                                    |                                            |                                        |                                     |                                             |                                         |                                                                        |                                              |                                       |                                    |                                          |                                   |                                           |                                      |                                           |                                |                                           |                                      |                                                    |                                       |  |                                                    |  |
| <input type="checkbox"/> Neurology                   | <input type="checkbox"/> Plastic surgery                               |                                                                                                                                                                                                                                                                                                                                                                                                                                                                                                                                                                                                                                                                                                                                                                                                                                                                                                                                                                                                                                                                                                                                                                                                                                                                                                                                                                                                                                                                                                                                                                                                                                     |                                          |                                                                    |                                                      |                                                                    |                                          |                                                    |                                                      |                                                    |                                            |                                        |                                     |                                             |                                         |                                                                        |                                              |                                       |                                    |                                          |                                   |                                           |                                      |                                           |                                |                                           |                                      |                                                    |                                       |  |                                                    |  |
| <input type="checkbox"/> Oncology                    | <input type="checkbox"/> Thoracic surgery                              |                                                                                                                                                                                                                                                                                                                                                                                                                                                                                                                                                                                                                                                                                                                                                                                                                                                                                                                                                                                                                                                                                                                                                                                                                                                                                                                                                                                                                                                                                                                                                                                                                                     |                                          |                                                                    |                                                      |                                                                    |                                          |                                                    |                                                      |                                                    |                                            |                                        |                                     |                                             |                                         |                                                                        |                                              |                                       |                                    |                                          |                                   |                                           |                                      |                                           |                                |                                           |                                      |                                                    |                                       |  |                                                    |  |
| <input type="checkbox"/> Psychiatric                 | <input type="checkbox"/> Urologic surgery                              |                                                                                                                                                                                                                                                                                                                                                                                                                                                                                                                                                                                                                                                                                                                                                                                                                                                                                                                                                                                                                                                                                                                                                                                                                                                                                                                                                                                                                                                                                                                                                                                                                                     |                                          |                                                                    |                                                      |                                                                    |                                          |                                                    |                                                      |                                                    |                                            |                                        |                                     |                                             |                                         |                                                                        |                                              |                                       |                                    |                                          |                                   |                                           |                                      |                                           |                                |                                           |                                      |                                                    |                                       |  |                                                    |  |
| <input type="checkbox"/> Renal                       | <input type="checkbox"/> Vascular surgery                              |                                                                                                                                                                                                                                                                                                                                                                                                                                                                                                                                                                                                                                                                                                                                                                                                                                                                                                                                                                                                                                                                                                                                                                                                                                                                                                                                                                                                                                                                                                                                                                                                                                     |                                          |                                                                    |                                                      |                                                                    |                                          |                                                    |                                                      |                                                    |                                            |                                        |                                     |                                             |                                         |                                                                        |                                              |                                       |                                    |                                          |                                   |                                           |                                      |                                           |                                |                                           |                                      |                                                    |                                       |  |                                                    |  |
| <input type="checkbox"/> Respiratory                 | <input type="checkbox"/> Other ( <i>specify</i> ):                     |                                                                                                                                                                                                                                                                                                                                                                                                                                                                                                                                                                                                                                                                                                                                                                                                                                                                                                                                                                                                                                                                                                                                                                                                                                                                                                                                                                                                                                                                                                                                                                                                                                     |                                          |                                                                    |                                                      |                                                                    |                                          |                                                    |                                                      |                                                    |                                            |                                        |                                     |                                             |                                         |                                                                        |                                              |                                       |                                    |                                          |                                   |                                           |                                      |                                           |                                |                                           |                                      |                                                    |                                       |  |                                                    |  |
| <input type="checkbox"/> Rheumatology                |                                                                        |                                                                                                                                                                                                                                                                                                                                                                                                                                                                                                                                                                                                                                                                                                                                                                                                                                                                                                                                                                                                                                                                                                                                                                                                                                                                                                                                                                                                                                                                                                                                                                                                                                     |                                          |                                                                    |                                                      |                                                                    |                                          |                                                    |                                                      |                                                    |                                            |                                        |                                     |                                             |                                         |                                                                        |                                              |                                       |                                    |                                          |                                   |                                           |                                      |                                           |                                |                                           |                                      |                                                    |                                       |  |                                                    |  |
| <input type="checkbox"/> Other ( <i>specify</i> ):   |                                                                        |                                                                                                                                                                                                                                                                                                                                                                                                                                                                                                                                                                                                                                                                                                                                                                                                                                                                                                                                                                                                                                                                                                                                                                                                                                                                                                                                                                                                                                                                                                                                                                                                                                     |                                          |                                                                    |                                                      |                                                                    |                                          |                                                    |                                                      |                                                    |                                            |                                        |                                     |                                             |                                         |                                                                        |                                              |                                       |                                    |                                          |                                   |                                           |                                      |                                           |                                |                                           |                                      |                                                    |                                       |  |                                                    |  |
| 13.                                                  | <b>Intervention</b><br><i>Check only one</i>                           | <table border="0"> <tr> <td><input type="checkbox"/> Pharmacological</td> <td><input type="checkbox"/> Complementary and<br/>alternative medicine</td> </tr> <tr> <td><input type="checkbox"/> Surgery/ Invasive procedure</td> <td><input type="checkbox"/> Diagnostic test</td> </tr> <tr> <td><input type="checkbox"/> Rehabilitation</td> <td><input type="checkbox"/> Other (<i>specify</i>):</td> </tr> <tr> <td><input type="checkbox"/> Behavioral intervention</td> <td></td> </tr> </table>                                                                                                                                                                                                                                                                                                                                                                                                                                                                                                                                                                                                                                                                                                                                                                                                                                                                                                                                                                                                                                                                                                                               | <input type="checkbox"/> Pharmacological | <input type="checkbox"/> Complementary and<br>alternative medicine | <input type="checkbox"/> Surgery/ Invasive procedure | <input type="checkbox"/> Diagnostic test                           | <input type="checkbox"/> Rehabilitation  | <input type="checkbox"/> Other ( <i>specify</i> ): | <input type="checkbox"/> Behavioral intervention     |                                                    |                                            |                                        |                                     |                                             |                                         |                                                                        |                                              |                                       |                                    |                                          |                                   |                                           |                                      |                                           |                                |                                           |                                      |                                                    |                                       |  |                                                    |  |
| <input type="checkbox"/> Pharmacological             | <input type="checkbox"/> Complementary and<br>alternative medicine     |                                                                                                                                                                                                                                                                                                                                                                                                                                                                                                                                                                                                                                                                                                                                                                                                                                                                                                                                                                                                                                                                                                                                                                                                                                                                                                                                                                                                                                                                                                                                                                                                                                     |                                          |                                                                    |                                                      |                                                                    |                                          |                                                    |                                                      |                                                    |                                            |                                        |                                     |                                             |                                         |                                                                        |                                              |                                       |                                    |                                          |                                   |                                           |                                      |                                           |                                |                                           |                                      |                                                    |                                       |  |                                                    |  |
| <input type="checkbox"/> Surgery/ Invasive procedure | <input type="checkbox"/> Diagnostic test                               |                                                                                                                                                                                                                                                                                                                                                                                                                                                                                                                                                                                                                                                                                                                                                                                                                                                                                                                                                                                                                                                                                                                                                                                                                                                                                                                                                                                                                                                                                                                                                                                                                                     |                                          |                                                                    |                                                      |                                                                    |                                          |                                                    |                                                      |                                                    |                                            |                                        |                                     |                                             |                                         |                                                                        |                                              |                                       |                                    |                                          |                                   |                                           |                                      |                                           |                                |                                           |                                      |                                                    |                                       |  |                                                    |  |
| <input type="checkbox"/> Rehabilitation              | <input type="checkbox"/> Other ( <i>specify</i> ):                     |                                                                                                                                                                                                                                                                                                                                                                                                                                                                                                                                                                                                                                                                                                                                                                                                                                                                                                                                                                                                                                                                                                                                                                                                                                                                                                                                                                                                                                                                                                                                                                                                                                     |                                          |                                                                    |                                                      |                                                                    |                                          |                                                    |                                                      |                                                    |                                            |                                        |                                     |                                             |                                         |                                                                        |                                              |                                       |                                    |                                          |                                   |                                           |                                      |                                           |                                |                                           |                                      |                                                    |                                       |  |                                                    |  |
| <input type="checkbox"/> Behavioral intervention     |                                                                        |                                                                                                                                                                                                                                                                                                                                                                                                                                                                                                                                                                                                                                                                                                                                                                                                                                                                                                                                                                                                                                                                                                                                                                                                                                                                                                                                                                                                                                                                                                                                                                                                                                     |                                          |                                                                    |                                                      |                                                                    |                                          |                                                    |                                                      |                                                    |                                            |                                        |                                     |                                             |                                         |                                                                        |                                              |                                       |                                    |                                          |                                   |                                           |                                      |                                           |                                |                                           |                                      |                                                    |                                       |  |                                                    |  |
| 14.                                                  | <b>Control</b><br><i>Check only one</i>                                | <table border="0"> <tr> <td><input type="checkbox"/> Standard care</td> <td><input type="checkbox"/> Behavioral intervention</td> </tr> <tr> <td><input type="checkbox"/> Placebo</td> <td><input type="checkbox"/> Complementary and<br/>alternative medicine</td> </tr> <tr> <td><input type="checkbox"/> Pharmacological</td> <td><input type="checkbox"/> Diagnostic test</td> </tr> <tr> <td><input type="checkbox"/> Surgery/ Invasive procedure</td> <td><input type="checkbox"/> Other (<i>specify</i>):</td> </tr> <tr> <td><input type="checkbox"/> Rehabilitation</td> <td></td> </tr> </table>                                                                                                                                                                                                                                                                                                                                                                                                                                                                                                                                                                                                                                                                                                                                                                                                                                                                                                                                                                                                                          | <input type="checkbox"/> Standard care   | <input type="checkbox"/> Behavioral intervention                   | <input type="checkbox"/> Placebo                     | <input type="checkbox"/> Complementary and<br>alternative medicine | <input type="checkbox"/> Pharmacological | <input type="checkbox"/> Diagnostic test           | <input type="checkbox"/> Surgery/ Invasive procedure | <input type="checkbox"/> Other ( <i>specify</i> ): | <input type="checkbox"/> Rehabilitation    |                                        |                                     |                                             |                                         |                                                                        |                                              |                                       |                                    |                                          |                                   |                                           |                                      |                                           |                                |                                           |                                      |                                                    |                                       |  |                                                    |  |
| <input type="checkbox"/> Standard care               | <input type="checkbox"/> Behavioral intervention                       |                                                                                                                                                                                                                                                                                                                                                                                                                                                                                                                                                                                                                                                                                                                                                                                                                                                                                                                                                                                                                                                                                                                                                                                                                                                                                                                                                                                                                                                                                                                                                                                                                                     |                                          |                                                                    |                                                      |                                                                    |                                          |                                                    |                                                      |                                                    |                                            |                                        |                                     |                                             |                                         |                                                                        |                                              |                                       |                                    |                                          |                                   |                                           |                                      |                                           |                                |                                           |                                      |                                                    |                                       |  |                                                    |  |
| <input type="checkbox"/> Placebo                     | <input type="checkbox"/> Complementary and<br>alternative medicine     |                                                                                                                                                                                                                                                                                                                                                                                                                                                                                                                                                                                                                                                                                                                                                                                                                                                                                                                                                                                                                                                                                                                                                                                                                                                                                                                                                                                                                                                                                                                                                                                                                                     |                                          |                                                                    |                                                      |                                                                    |                                          |                                                    |                                                      |                                                    |                                            |                                        |                                     |                                             |                                         |                                                                        |                                              |                                       |                                    |                                          |                                   |                                           |                                      |                                           |                                |                                           |                                      |                                                    |                                       |  |                                                    |  |
| <input type="checkbox"/> Pharmacological             | <input type="checkbox"/> Diagnostic test                               |                                                                                                                                                                                                                                                                                                                                                                                                                                                                                                                                                                                                                                                                                                                                                                                                                                                                                                                                                                                                                                                                                                                                                                                                                                                                                                                                                                                                                                                                                                                                                                                                                                     |                                          |                                                                    |                                                      |                                                                    |                                          |                                                    |                                                      |                                                    |                                            |                                        |                                     |                                             |                                         |                                                                        |                                              |                                       |                                    |                                          |                                   |                                           |                                      |                                           |                                |                                           |                                      |                                                    |                                       |  |                                                    |  |
| <input type="checkbox"/> Surgery/ Invasive procedure | <input type="checkbox"/> Other ( <i>specify</i> ):                     |                                                                                                                                                                                                                                                                                                                                                                                                                                                                                                                                                                                                                                                                                                                                                                                                                                                                                                                                                                                                                                                                                                                                                                                                                                                                                                                                                                                                                                                                                                                                                                                                                                     |                                          |                                                                    |                                                      |                                                                    |                                          |                                                    |                                                      |                                                    |                                            |                                        |                                     |                                             |                                         |                                                                        |                                              |                                       |                                    |                                          |                                   |                                           |                                      |                                           |                                |                                           |                                      |                                                    |                                       |  |                                                    |  |
| <input type="checkbox"/> Rehabilitation              |                                                                        |                                                                                                                                                                                                                                                                                                                                                                                                                                                                                                                                                                                                                                                                                                                                                                                                                                                                                                                                                                                                                                                                                                                                                                                                                                                                                                                                                                                                                                                                                                                                                                                                                                     |                                          |                                                                    |                                                      |                                                                    |                                          |                                                    |                                                      |                                                    |                                            |                                        |                                     |                                             |                                         |                                                                        |                                              |                                       |                                    |                                          |                                   |                                           |                                      |                                           |                                |                                           |                                      |                                                    |                                       |  |                                                    |  |

| METHODOLOGICAL QUALITY |                                                           |                                                                         |                                                          |                                                |
|------------------------|-----------------------------------------------------------|-------------------------------------------------------------------------|----------------------------------------------------------|------------------------------------------------|
| 15.                    | <b>Concealment of Allocation</b><br><i>Check only one</i> | <input type="checkbox"/> Sequentially numbered, opaque, sealed envelope | <input type="checkbox"/> Coded medication containers     | <input type="checkbox"/> Central randomization |
|                        |                                                           | <input type="checkbox"/> Envelopes, other                               | <input type="checkbox"/> Open random allocation schedule | <input type="checkbox"/> Quasi-randomized      |
|                        |                                                           | <input type="checkbox"/> "Concealed", no method described               | <input type="checkbox"/> "Not concealed"                 | <input type="checkbox"/> Not reported          |
| 16.                    | <b>Blinding of patients</b>                               | <input type="checkbox"/> Definitely yes                                 | <input type="checkbox"/> Probably yes                    | <input type="checkbox"/> Probably not          |
|                        |                                                           |                                                                         |                                                          | <input type="checkbox"/> Definitely not        |
| 17.                    | <b>Blinding of health Care providers</b>                  | <input type="checkbox"/> Definitely yes                                 | <input type="checkbox"/> Probably yes                    | <input type="checkbox"/> Probably not          |
|                        |                                                           |                                                                         |                                                          | <input type="checkbox"/> Definitely not        |
| 18.                    | <b>Blinding of data collectors</b>                        | <input type="checkbox"/> Definitely yes                                 | <input type="checkbox"/> Probably yes                    | <input type="checkbox"/> Probably not          |
|                        |                                                           |                                                                         |                                                          | <input type="checkbox"/> Definitely not        |
| 19.                    | <b>Blinding of outcome adjudicators</b>                   | <input type="checkbox"/> Definitely yes                                 | <input type="checkbox"/> Probably yes                    | <input type="checkbox"/> Probably not          |
|                        |                                                           |                                                                         |                                                          | <input type="checkbox"/> Definitely not        |
| 20.                    | <b>Blinding of data analysts</b>                          | <input type="checkbox"/> Definitely yes                                 | <input type="checkbox"/> Probably yes                    | <input type="checkbox"/> Probably not          |
|                        |                                                           |                                                                         |                                                          | <input type="checkbox"/> Definitely not        |
| 21.                    | <b>Study stopped early for benefit</b>                    | <input type="checkbox"/> Yes                                            | <input type="checkbox"/> No                              |                                                |

| ITT PRINCIPLE |                                                                                                           |                                         |                                              |                                         |
|---------------|-----------------------------------------------------------------------------------------------------------|-----------------------------------------|----------------------------------------------|-----------------------------------------|
| 22.           | <b>Authors used the term ITT</b>                                                                          | <input type="checkbox"/> Yes, "ITT"     | <input type="checkbox"/> Yes, "modified ITT" | <input type="checkbox"/> No             |
| 23.           | <b>Post randomization exclusion of mistakenly randomized</b>                                              | <input type="checkbox"/> Definitely yes | <input type="checkbox"/> Probably yes        | <input type="checkbox"/> Probably not   |
|               |                                                                                                           |                                         |                                              | <input type="checkbox"/> Definitely not |
| 24.           | <b>Information about ineligibility was available at randomization</b>                                     | <input type="checkbox"/> Definitely yes | <input type="checkbox"/> Probably yes        | <input type="checkbox"/> Probably not   |
|               |                                                                                                           |                                         |                                              | <input type="checkbox"/> Definitely not |
| 25.           | <b>Post randomization exclusions were blinded to allocation</b>                                           | <input type="checkbox"/> Definitely yes | <input type="checkbox"/> Probably yes        | <input type="checkbox"/> Probably not   |
|               |                                                                                                           |                                         |                                              | <input type="checkbox"/> Definitely not |
| 26.           | <b>Patients for whom outcome data is available were analyzed in the arm to which they were randomized</b> | <input type="checkbox"/> Definitely yes | <input type="checkbox"/> Probably yes        | <input type="checkbox"/> Probably not   |
|               |                                                                                                           |                                         |                                              | <input type="checkbox"/> Definitely not |

| LTFU STATEMENTS |                                                                                                                     |                                                                   |                                                                                     |                                                                        |
|-----------------|---------------------------------------------------------------------------------------------------------------------|-------------------------------------------------------------------|-------------------------------------------------------------------------------------|------------------------------------------------------------------------|
| 27.             | LTFU explicitly reported                                                                                            | <input type="checkbox"/> Explicit statement: LTFU occurred        | <input type="checkbox"/> Explicit statement: LTFU did not occur                     | <input type="checkbox"/> No explicit statement about LTFU              |
| 28.             | CONSORT flow diagram                                                                                                | <input type="checkbox"/> CONSORT diagram showing LTFU             | <input type="checkbox"/> CONSORT diagram not showing LTFU                           | <input type="checkbox"/> No CONSORT diagram                            |
| 29.             | For studies with no explicit statement about LTFU and no consort diagram                                            | <input type="checkbox"/> Meet all "3 criteria" (see instructions) | <input type="checkbox"/> Does not meet all "3 criteria" (see instructions)          | <input type="checkbox"/> N/A                                           |
| 30.             | LTFU reported separately for the 2 arms                                                                             | <input type="checkbox"/> Yes                                      | <input type="checkbox"/> No                                                         |                                                                        |
| 31.             | LTFU reported for each time point in which effect estimate for 1 <sup>ary</sup> outcome is reported in this article | <input type="checkbox"/> Yes                                      | <input type="checkbox"/> No                                                         | <input type="checkbox"/> N/A (only one effect estimate reported)       |
| 32.             | Authors compared baseline characteristics of LTFU                                                                   | <input type="checkbox"/> Yes, LTFU group vs. non LTFU group       | <input type="checkbox"/> Yes, LTFU 1 <sup>st</sup> arm vs. LTFU 2 <sup>nd</sup> arm | <input type="checkbox"/> No                                            |
| 33.             | Implications of LTFU discussed                                                                                      | <input type="checkbox"/> Yes <input type="checkbox"/> No          |                                                                                     |                                                                        |
| 34.             | Method of dealing with LTFU explicitly described (check all that apply)                                             | <input type="checkbox"/> Yes, survival analysis                   | <input type="checkbox"/> Yes, in "methods"                                          | <input type="checkbox"/> Yes, in "results" <input type="checkbox"/> No |

| 35. METHOD OF DEALING WITH LTFU (for the primary outcome)                                 |                                                   |                                               |  |
|-------------------------------------------------------------------------------------------|---------------------------------------------------|-----------------------------------------------|--|
| Method                                                                                    | Primary analysis<br>(check at least and only one) | Additional analyses<br>(check all applicable) |  |
| Not applicable, no LTFU occurred                                                          | <input type="checkbox"/>                          | <input type="checkbox"/>                      |  |
| Not applicable, uncertain whether LTFU occurred                                           | <input type="checkbox"/>                          | <input type="checkbox"/>                      |  |
| Unclear which method used                                                                 | <input type="checkbox"/>                          | <input type="checkbox"/>                      |  |
| Survival analysis (censored at the time of LTFU)                                          | <input type="checkbox"/>                          | <input type="checkbox"/>                      |  |
| Complete case analysis                                                                    | <input type="checkbox"/>                          | <input type="checkbox"/>                      |  |
| Worst case scenario                                                                       | <input type="checkbox"/>                          | <input type="checkbox"/>                      |  |
| Best case scenario                                                                        | <input type="checkbox"/>                          | <input type="checkbox"/>                      |  |
| None of the LTFU had the outcome                                                          | <input type="checkbox"/>                          | <input type="checkbox"/>                      |  |
| All LTFU had the outcome                                                                  | <input type="checkbox"/>                          | <input type="checkbox"/>                      |  |
| LTFU had same outcome incidence as their group                                            | <input type="checkbox"/>                          | <input type="checkbox"/>                      |  |
| LTFU had higher outcome incidence than their group, same incidence in 2 study groups      | <input type="checkbox"/>                          | <input type="checkbox"/>                      |  |
| LTFU had higher outcome incidence than their group, different incidence in 2 study groups | <input type="checkbox"/>                          | <input type="checkbox"/>                      |  |
| Different methods for different subgroups of LTFU:                                        | <input type="checkbox"/>                          | <input type="checkbox"/>                      |  |
| Other (specify):                                                                          | <input type="checkbox"/>                          | <input type="checkbox"/>                      |  |

| LTFU STATISTICAL DATA                                                                                                                                                                                         |                                                                                                                                                                                                                                                                                                                                                           |              |         |       |                                                                                                                      |
|---------------------------------------------------------------------------------------------------------------------------------------------------------------------------------------------------------------|-----------------------------------------------------------------------------------------------------------------------------------------------------------------------------------------------------------------------------------------------------------------------------------------------------------------------------------------------------------|--------------|---------|-------|----------------------------------------------------------------------------------------------------------------------|
| 36. Primary outcome selected for LOST-IT (q3 or q4): _____<br><input type="checkbox"/> Check here if outcome was reversed from positive to negative                                                           |                                                                                                                                                                                                                                                                                                                                                           |              |         |       |                                                                                                                      |
| 37. Follow-up time point (value): _____                                                                                                                                                                       |                                                                                                                                                                                                                                                                                                                                                           |              |         |       |                                                                                                                      |
| 38. Unit of time: <input type="checkbox"/> minutes <input type="checkbox"/> hours <input type="checkbox"/> days <input type="checkbox"/> weeks <input type="checkbox"/> months <input type="checkbox"/> years |                                                                                                                                                                                                                                                                                                                                                           |              |         |       |                                                                                                                      |
| 39. Type of measure: <input type="checkbox"/> fixed period <input type="checkbox"/> mean <input type="checkbox"/> median <input type="checkbox"/> minimum <input type="checkbox"/> maximum                    |                                                                                                                                                                                                                                                                                                                                                           |              |         |       |                                                                                                                      |
|                                                                                                                                                                                                               | <i>This table relates to the <u>primary analysis</u> of the <u>primary outcome</u></i>                                                                                                                                                                                                                                                                    | Intervention | Control | Total | <input type="checkbox"/> Different assumptions for different subgroups of LTFU (circle one choice, see instructions) |
| 40.                                                                                                                                                                                                           | <input type="checkbox"/> Mistakenly randomized, inappropriately excluded (subtotal 1)                                                                                                                                                                                                                                                                     |              |         |       | 1 2 3 4 5                                                                                                            |
| 41.                                                                                                                                                                                                           | <input type="checkbox"/> Did not receive intervention, inappropriately excluded (subtotal 2)                                                                                                                                                                                                                                                              |              |         |       | 1 2 3 4 5                                                                                                            |
| 42.                                                                                                                                                                                                           | <input type="checkbox"/> Withdrew consent (subtotal 3)<br><input type="checkbox"/> unclear whether followed up<br><input type="checkbox"/> not followed up<br><input type="checkbox"/> followed up, not included in the analysis (not LTFU for LOST-IT)                                                                                                   |              |         |       |                                                                                                                      |
| 43.                                                                                                                                                                                                           | <i>Withdrew consent due to side effect or adverse events</i>                                                                                                                                                                                                                                                                                              |              |         |       | 1 2 3 4 5                                                                                                            |
| 44.                                                                                                                                                                                                           | <i>Withdrew consent due to other specified reason:</i>                                                                                                                                                                                                                                                                                                    |              |         |       | 1 2 3 4 5                                                                                                            |
| 45.                                                                                                                                                                                                           | <i>Withdrew consent due to unclear reason</i>                                                                                                                                                                                                                                                                                                             |              |         |       | 1 2 3 4 5                                                                                                            |
| 46.                                                                                                                                                                                                           | <input type="checkbox"/> Cross over (subtotal 4)<br><input type="checkbox"/> unclear whether followed up<br><input type="checkbox"/> not followed up<br><input type="checkbox"/> followed up, not included in the analysis (not LTFU for LOST-IT)<br><input type="checkbox"/> followed up, analyzed in a group not randomized to (not LTFU for LOST-IT)   |              |         |       |                                                                                                                      |
| 47.                                                                                                                                                                                                           | <i>Cross over due to side effect or adverse events</i>                                                                                                                                                                                                                                                                                                    |              |         |       | 1 2 3 4 5                                                                                                            |
| 48.                                                                                                                                                                                                           | <i>Cross over due to other specified reason:</i>                                                                                                                                                                                                                                                                                                          |              |         |       | 1 2 3 4 5                                                                                                            |
| 49.                                                                                                                                                                                                           | <i>Cross over due to unclear reason</i>                                                                                                                                                                                                                                                                                                                   |              |         |       | 1 2 3 4 5                                                                                                            |
| 50.                                                                                                                                                                                                           | <input type="checkbox"/> Non adherent (subtotal 5)<br><input type="checkbox"/> unclear whether followed up<br><input type="checkbox"/> not followed up<br><input type="checkbox"/> followed up, not included in the analysis (not LTFU for LOST-IT)<br><input type="checkbox"/> followed up, analyzed in a group not randomized to (not LTFU for LOST-IT) |              |         |       |                                                                                                                      |
| 51.                                                                                                                                                                                                           | <i>Non adherent due to side effect or adverse events</i>                                                                                                                                                                                                                                                                                                  |              |         |       | 1 2 3 4 5                                                                                                            |
| 52.                                                                                                                                                                                                           | <i>Non adherent due to other specified reason:</i>                                                                                                                                                                                                                                                                                                        |              |         |       | 1 2 3 4 5                                                                                                            |
| 53.                                                                                                                                                                                                           | <i>Non adherent due to unclear reason</i>                                                                                                                                                                                                                                                                                                                 |              |         |       | 1 2 3 4 5                                                                                                            |
| 54.                                                                                                                                                                                                           | <input type="checkbox"/> Lost contact and no other source of outcome data (subtotal 6)                                                                                                                                                                                                                                                                    |              |         |       | 1 2 3 4 5                                                                                                            |

|     |                                                                                                                                                                                                                                                                                                         |  |  |  |           |
|-----|---------------------------------------------------------------------------------------------------------------------------------------------------------------------------------------------------------------------------------------------------------------------------------------------------------|--|--|--|-----------|
| 55. | <input type="checkbox"/> <b>Other (or no reported) reason for LTFU:</b><br>_____, (subtotal 7)<br><input type="checkbox"/> unclear whether followed up<br><input type="checkbox"/> not followed up<br><input type="checkbox"/> followed up, not included in the analysis (not LTFU for LOST-IT)         |  |  |  | 1 2 3 4 5 |
| 56. | <input type="checkbox"/> <b>Different categories of LTFU reported together:</b><br>_____, (subtotal 8)<br><input type="checkbox"/> unclear whether followed up<br><input type="checkbox"/> not followed up<br><input type="checkbox"/> followed up, not included in the analysis (not LTFU for LOST-IT) |  |  |  | 1 2 3 4 5 |
| 57. | LTFU, total                                                                                                                                                                                                                                                                                             |  |  |  |           |

| This table relates to the <u>primary analysis</u> of the <u>primary outcome</u> |                                                                  | Intervention                     |        | Control                             |        | Total                                               |        |                              |  |
|---------------------------------------------------------------------------------|------------------------------------------------------------------|----------------------------------|--------|-------------------------------------|--------|-----------------------------------------------------|--------|------------------------------|--|
|                                                                                 |                                                                  | Total                            | Events | Total                               | Events | Total                                               | Events |                              |  |
| 58.                                                                             | Mistakenly randomized, appropriately excluded                    |                                  |        |                                     |        |                                                     |        |                              |  |
| 59.                                                                             | Did not receive intervention, appropriately excluded             |                                  |        |                                     |        |                                                     |        |                              |  |
| 60.                                                                             | Excluded as part of center exclusion                             |                                  |        |                                     |        |                                                     |        |                              |  |
| 61.                                                                             | Randomized                                                       |                                  |        |                                     |        |                                                     |        |                              |  |
| 62.                                                                             | Randomized\$ (Randomized – appropriately excluded 61-(58+59+60)) |                                  |        |                                     |        |                                                     |        |                              |  |
| 63.                                                                             | Included in primary analysis                                     |                                  |        |                                     |        |                                                     |        |                              |  |
| 64.                                                                             | Followed-up                                                      |                                  |        |                                     |        |                                                     |        |                              |  |
| 65.                                                                             | Measure of effect estimate                                       | <input type="checkbox"/> RR      |        | <input type="checkbox"/> HR         |        | <input type="checkbox"/> OR                         |        | <input type="checkbox"/> RRR |  |
|                                                                                 |                                                                  | <input type="checkbox"/> ARR/ARI |        | <input type="checkbox"/> Time ratio |        | <input type="checkbox"/> Cumulative incidence ratio |        |                              |  |
| 66.                                                                             | Unadjusted Effect estimate; 95% CI; p value                      | _____ (_____; _____); p=_____    |        |                                     |        |                                                     |        |                              |  |
| 67.                                                                             | Adjusted Effect estimate; 95% CI; p value                        | _____ (_____; _____); p=_____    |        |                                     |        |                                                     |        |                              |  |

|     |                                                                                                                                                                                                                                          |
|-----|------------------------------------------------------------------------------------------------------------------------------------------------------------------------------------------------------------------------------------------|
| 68. | Inconsistency in LTFU data (explain below)                                                                                                                                                                                               |
| 69. | Misunderstanding of LTFU or questionable inferences (explain below)                                                                                                                                                                      |
| 70. | Time required to complete this form: _____ min                                                                                                                                                                                           |
| 71. | <input type="checkbox"/> Check here if we need to ask authors for numbers per study arm (if only total numbers reported)<br><input type="checkbox"/> Check here if we need to ask authors for the total number of LTFU (if not reported) |
